# Supplementary material for: Tailoring the mechanical properties of benzothiadiazole-based semiconducting polymers through chalcogen atom substitution
Source: Royal Society of Chemistry journal article supplement (doi:10.1039/d3tc02386a), 2023-01-01
Supplement: d3tc02386a1.pdf [file d3tc02386a1.pdf]

## Supporting Information

### **Tailoring the Mechanical Properties of Benzothiadiazole-Based Semiconducting Polymers through Chalcogen Atom Substitution**

*Piumi Kulatunga,<sup>1</sup> Marc Comi,<sup>2</sup> Tiago Carneiro Gomes,<sup>1</sup> Moutasem Seifi,<sup>1</sup> Robabeh Majidzadeh,<sup>1</sup> Mohammed Al-Hashimi,<sup>\*2</sup> and Simon Rondeau-Gagné<sup>\*1</sup>*

<sup>1</sup> Department of Chemistry and Biochemistry, Advanced Materials Centre of Research, University of Windsor, Windsor, ON, Canada N9B 3P4.

<sup>2</sup> Department of Chemistry, Texas A&M University at Qatar, Education City, Doha, P.O. Box 23874, Qatar.

#### **Correspondence should be addressed to:**

\* Prof. Simon Rondeau-Gagné ([srondeau@uwindsor.ca](mailto:srondeau@uwindsor.ca))

\* Mohammed Al-Hashimi, email: [mohammed.al-hashimi@tamu.edu](mailto:mohammed.al-hashimi@tamu.edu)

#### **Contents**

|                                                                          |                                       |
|--------------------------------------------------------------------------|---------------------------------------|
| Materials and Methods.....                                               | S-2                                   |
| Transfer-Printed Organic Field-Effect Transistor Fabrication.....        | S-3                                   |
| Experimental Procedure .....                                             | S-3                                   |
| Materials Characterization .....                                         | S-5                                   |
| Optical and structure properties .....                                   | S-6                                   |
| Mechanical properties .....                                              | <b>S-Error! Bookmark not defined.</b> |
| Charge transport properties in OFETs upon strain .....                   | S-9                                   |
| Output and transfer curves of OFETs upon strain .....                    | S-12                                  |
| Polymers Thickness Measurements with Atomic Force Microscopy (AFM) ..... | S-20                                  |

## Materials and Methods

All commercially available solvents, reagents, and chemicals were used as received without further purification unless otherwise stated. Anhydrous solvent tetrahydrofuran was distilled from sodium under argon. 4,7-Dibromo-5,6-difluorobenzo[*c*][1,2,5]thiadiazole, 2-octan-1-ol, sodium *tert*-butoxide, *N*-bromosuccinimide were purchased from Sigma Aldrich. Unless otherwise stated all operations and reactions were carried out under argon using standard Schlenk line techniques. <sup>1</sup>H spectrum was recorded on a Bruker AV-400 (400 MHz), using the residual solvent resonance of CDCl<sub>3</sub> or TMS as an internal reference and are given in ppm. Number-average molecular weight ( $M_n$ ) and weight average molecular weight ( $M_w$ ) were determined by Agilent Technologies 1200 series GPC running in chlorobenzene at 85 °C, using two PL mixed B columns in series, and calibrated against narrow polydispersity polystyrene standards. UV-visible spectroscopy was performed on a Varian UV/Visible Cary 50 spectrophotometer. Flash chromatography (FC) was performed on silica gel (Merck Kieselgel 60 F254 230-400 mesh) unless otherwise indicated. Thin Layer Chromatography (TLC) was performed on Merck aluminum-backed plates pre-coated with silica (0.2 mm, 60 F254). Microwave experiments were performed in a Biotage initiator V 2.3. The surface structure of polymer film was obtained using a Multimode atomic force microscope (AFM, Digital Instruments) operated in the tapping mode at room temperature. Images were collected using Nanoscope 6 software and processed using Gwyddion software. All the measurements of the transistors were conducted using a Keithley 4200 semiconductor parameter analyzer (Keithley Instruments Inc.) under dry N<sub>2</sub> (glovebox) and at room temperature.

## Transfer-Printed Organic Field-Effect Transistor Fabrication

To measure the charge mobilities upon stretching, a lamination procedure adapted from previous literature was used to laminate the semiconducting polymer films onto PDMS. The resulting thin films supported on PDMS were stretched to 0%, 10%, 20%, and 30% strain, and laminated back to Si wafers. Source and drain top electrodes were deposited parallel and perpendicular to the stretching direction by evaporating gold ( $\approx 50$  nm) through a shadow mask with a channel length ( $L$ ) and width ( $W$ ) defined as 100 and 1000  $\mu\text{m}$ , respectively. All measurements were conducted using a Keithley 4200-SCS semiconductor parameter analyzer (Keithley Instruments Inc., Cleveland, OH, USA) in an  $\text{N}_2$  filled glove box at room temperature. Polymers were dissolved in 10mg/mL Chlorobenzene.

## Experimental Procedure

In a microwave vial equimolar amounts of monomer (0.20 mmol) and bis(trimethylstannyl) [thiophene (**P1**) or selenophene (**P2**) or bithiophene (**P3**) or biselenophene (**P4**) were dissolved in anhydrous chlorobenzene (0.5 mL) followed by addition of tetrakis(triphenylphosphine)palladium (2 mol%, 5.02 mg), the resultant mixture was degassed for 30 min with argon and securely sealed. The glass vial was placed into a microwave reactor and heated at 140  $^{\circ}\text{C}$  for 2 min, 160  $^{\circ}\text{C}$  for 2 min, and followed by 180  $^{\circ}\text{C}$  for 30 min. After being cooled to room temperature, the reaction mixture was precipitated into a mixture of methanol (200 mL) and concentrated HCl (2 mL) and stirred for 1 h at RT. The precipitate was filtered and extracted (Soxhlet) with methanol, acetone, n-hexane, chloroform. The remaining polymer was dissolved in chlorobenzene and precipitated into methanol, filtered and dried under vacuum to achieve the desired polymers as a dark purple solid. The  $^1\text{H}$  NMR spectrum for all polymers exhibited considerable broadening of the aromatic

and methylene peaks and only alkyl sidechain protons were observable. The full characterization for polymers **P1** to **P3** can be found in previous reports.<sup>1</sup> The list of NMR peaks for all polymers have been included below.

**P1:** Yield 95 mg, <sup>1</sup>H NMR (400 MHz, CDCl<sub>3</sub>) δ 8.48 (2H), 7.71 (1H), 7.53 (1H), 4.21 (4H), 2.92 (4H), 2.02 (4H), 1.82 (4H), 1.20-1.60 (40H), 0.89 (12H); GPC:  $M_n = 42,400$  g/mol,  $D = 2.1$ ; UV-vis:  $\lambda_{max} = 565$  nm (dilute chlorobenzene solution).

**P2:** Dark Purple, Yield 95 mg, <sup>1</sup>H NMR (400 MHz, CDCl<sub>3</sub>) δ 8.47 (2H), 7.72 (1H), 7.53 (1H), 4.21 (4H), 2.95 (4H), 2.02 (4H), 1.81 (4H), 1.20-1.60 (40H), 0.89 (12H); GPC:  $M_n = 46,200$  g/mol,  $D = 2.0$ ; UV-vis:  $\lambda_{max} = 551$  nm (dilute chlorobenzene solution).

**P3:** Dark Purple, Yield 95 mg, <sup>1</sup>H NMR (400 MHz, CDCl<sub>3</sub>) δ 8.47 (2H), 7.72 (1H), 7.51 (1H), 7.42 (2H), 4.22 (4H), 2.92 (4H), 2.02 (4H), 1.82 (4H), 1.20-1.60 (40H), 0.89 (12H); GPC:  $M_n = 39,600$ g/mol,  $D = 1.9$  UV-vis:  $\lambda_{max} = 551$  nm (dilute chlorobenzene solution).

**P4:** Dark Purple, Yield 95 mg, <sup>1</sup>H NMR (400 MHz, CDCl<sub>3</sub>) δ 8.47 (2H), 7.73 (1H), 7.52 (1H), 4.20(4H), 2.95 (4H), 2.02 (4H), 1.81 (4H), 1.20-1.60 (40H), 0.89 (12H); GPC:  $M_n = 41,200$  g/mol,  $D = 2.0$ ; UV-vis:  $\lambda_{max} = 551$  nm (dilute chlorobenzene solution).

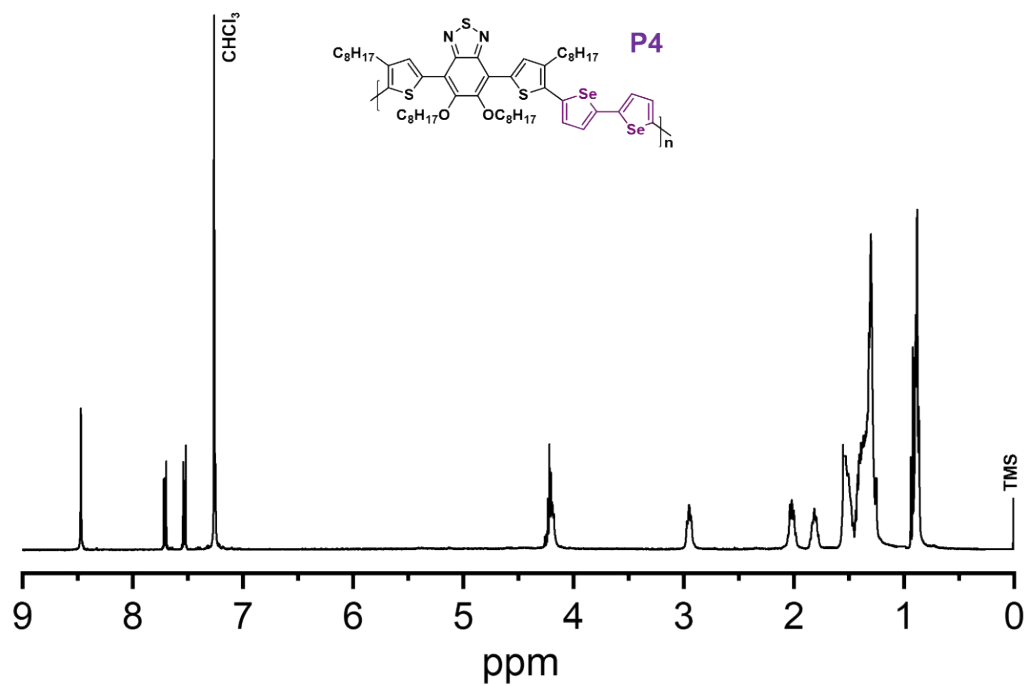

**Figure S1.**  $^1\text{H}$  NMR spectrum of **P4** in  $\text{CDCl}_3$

### Materials Characterization

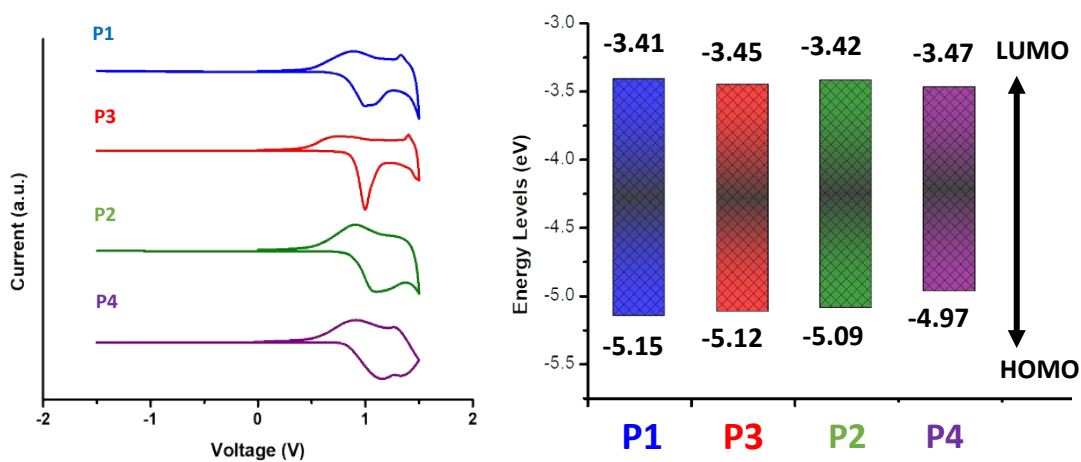

**Figure S2:** (a) Cyclic voltammograms of **P1–P4** as thin film (scan rate  $50 \text{ mV s}^{-1}$ ), (b) HOMO and LUMO energy levels of the copolymers **P1–P4**.

## Optical and structure properties

**Table S1:** Summary of molecular weights, optical, and electrochemical, copolymers **P1–P4**

| Sample    | $M_n$ (kDa) | $\bar{D}$ | HOMO (eV) | LUMO (eV) | $E_g^{el}$ (eV) |
|-----------|-------------|-----------|-----------|-----------|-----------------|
| <b>P1</b> | 42          | 2.1       | -5.15     | -3.41     | 1.74            |
| <b>P2</b> | 40          | 2.0       | -5.09     | -3.42     | 1.67            |
| <b>P3</b> | 46          | 1.9       | -5.12     | -3.45     | 1.67            |
| <b>P4</b> | 41          | 2.1       | -4.97     | -3.47     | 1.50            |

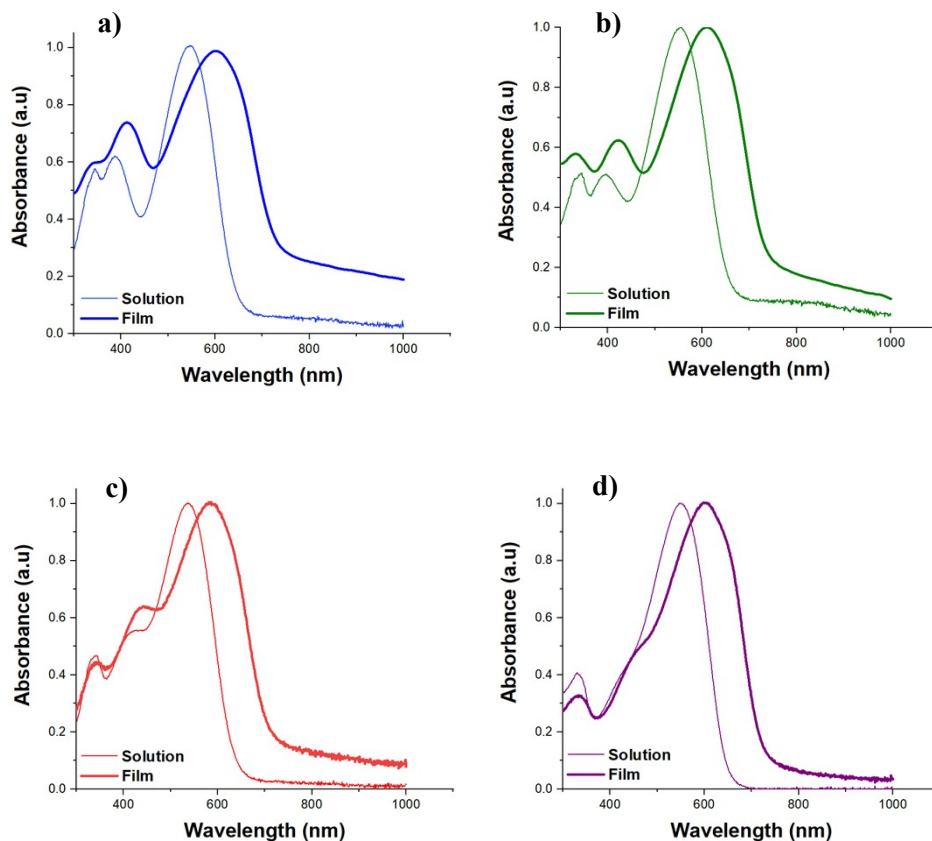

**Figure S3.** UV-vis absorption spectra in solution (chlorobenzene) and thin films spin-coated on  $\text{SiO}_2$  for a) **P1**, b) **P2**, c) **P3**, and (d) **P4**.

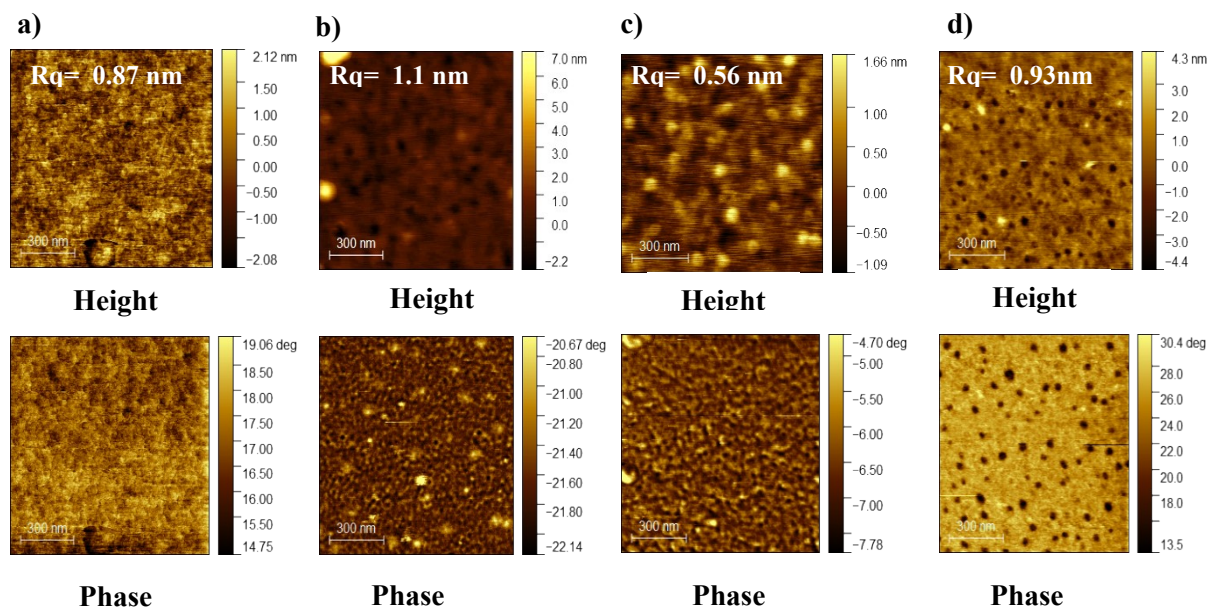

**Figure S4.** Atomic-force microscopy (tapping mode) height and phase images of a) P1, b) P2, c) P3 and d) P4. Scale bar is 300 nm.

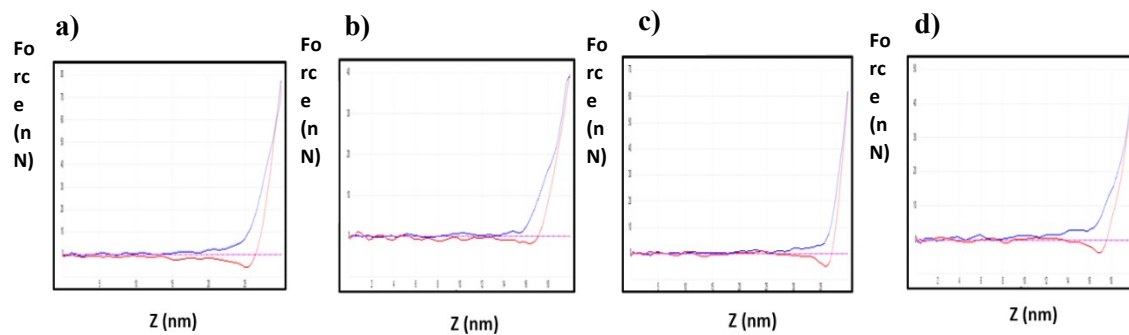

**Figure S5.** DMT modulus Force curves for a) P1, b) P2, c) P3, and d) P4.

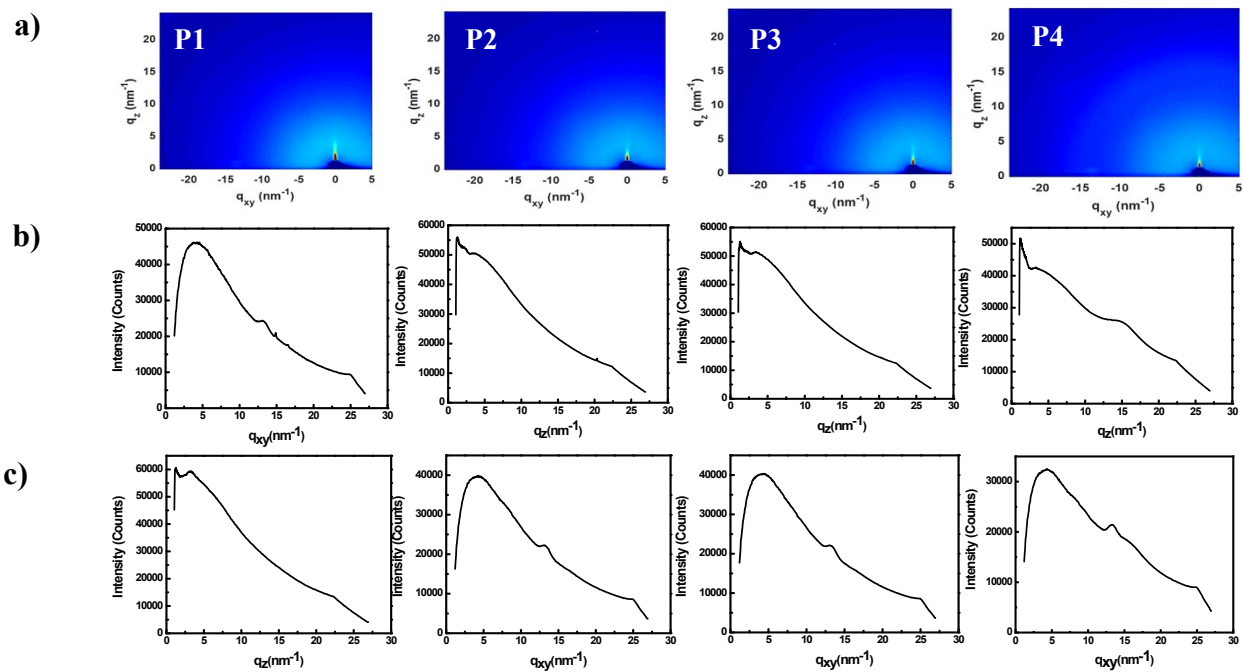

**Figure S6.** GIWAXS 2D patterns of (a) **P1-P4**, 1D scattering profiles (b) out of plane and (c) in plane profiles, obtained from 2D GIWAXS data.



## Charge transport properties in OFETs upon strain

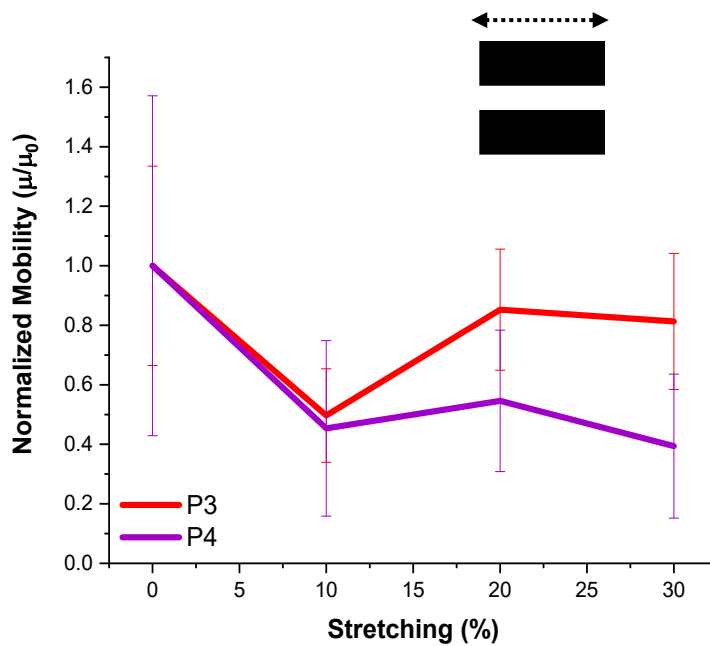

**Figure S7:** Mobility values of stretched films for **P3** and **P4** normalized by initial values at 0% strain for charge transport oriented perpendicular to strain direction.

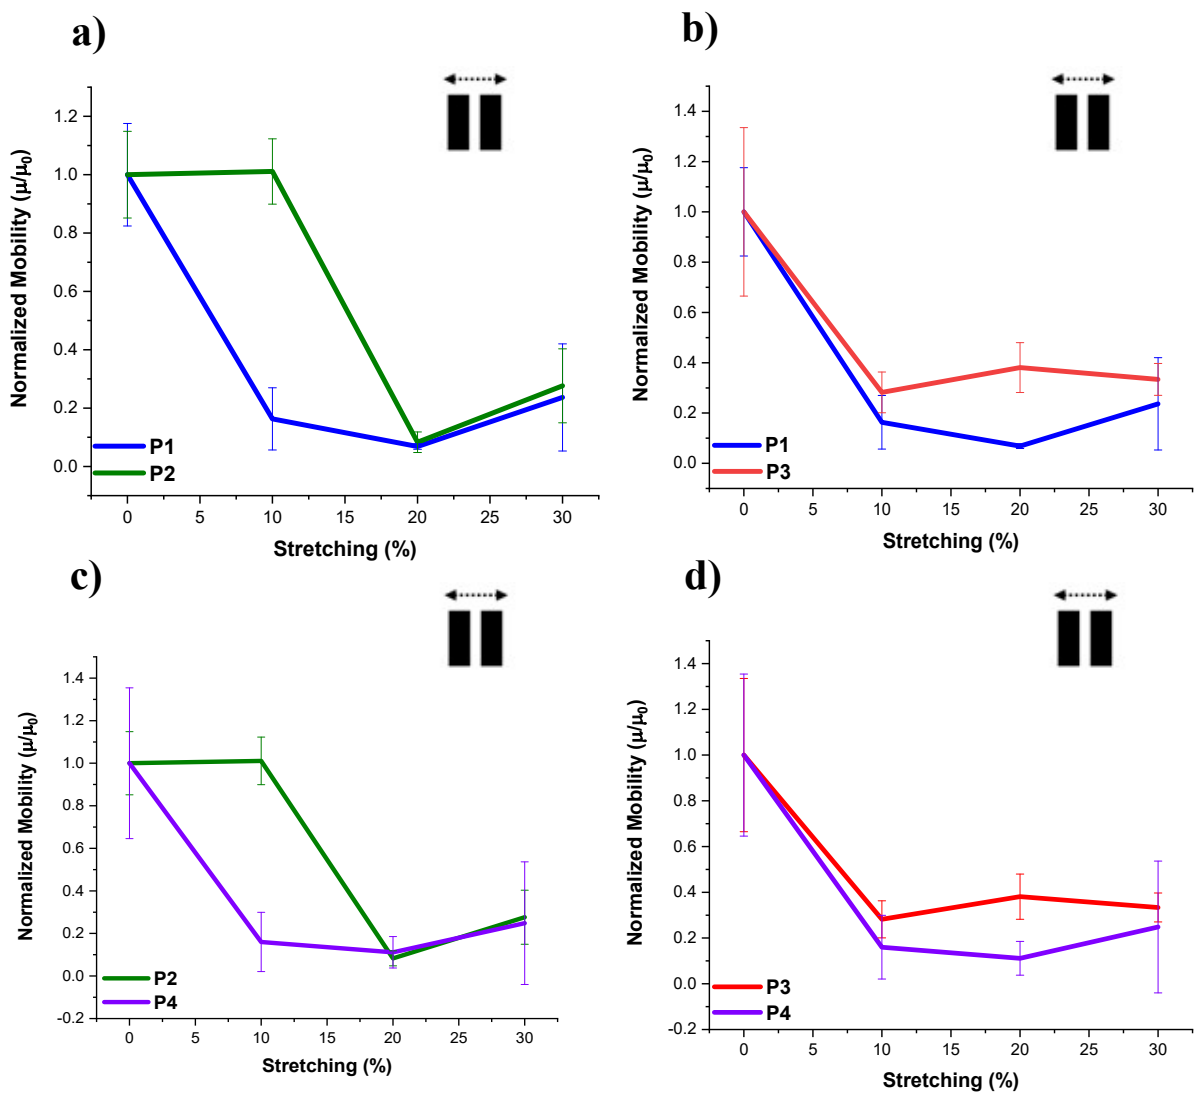

**Figure S8:** Mobility values of stretched films for **P1** to **P4** normalized by initial values at 0% strain for charge transport oriented parallel to strain direction. (a) **P1** and **P2** (b) **P1** and **P3** (c) **P2** and **P4**, (d) **P3** and **P4**.

**Table S3.** Average ( $\mu_h^{avg}$ ) and maximum hole mobilities ( $\mu_h^{max}$ ), threshold voltages ( $V_{th}$ ),  $I_{ON}/I_{OFF}$  ratios for OFETs fabricated using pre-stretched (0 and 25% strain) polymer blend films (0 to 50 wt.% LPE). The device performances were averaged from 5 devices and W/L represents channel width/length.

| Sample   | Direction                                                        | Strain %                                                         | W/L    | $\mu_h^{avg}/\mu_h^{max}$ ( $\text{cm}^2 \text{V}^{-1} \text{s}^{-1}$ ) | $I_{ON}/I_{OFF}^{avg}$ | $V_{th}^{avg}$ (V) |                                                                  |        |                 |
|----------|------------------------------------------------------------------|------------------------------------------------------------------|--------|-------------------------------------------------------------------------|------------------------|--------------------|------------------------------------------------------------------|--------|-----------------|
| P1       | Perpendicular                                                    | 0                                                                | 10     | $6.7 \times 10^{-5} \pm 5.8 \times 10^{-5} / 7.3 \times 10^{-5}$        | $10^1$                 | $-11.2 \pm 0.8$    |                                                                  |        |                 |
|          |                                                                  | 10                                                               |        | $1.7 \times 10^{-5} \pm 4.3 \times 10^{-5} / 2.2 \times 10^{-5}$        | $10^1$                 | $-12.9 \pm 1.9$    |                                                                  |        |                 |
|          |                                                                  | 20                                                               |        | $8.6 \times 10^{-6} \pm 7.9 \times 10^{-5} / 2.1 \times 10^{-5}$        | $10^2$                 | $-17.4 \pm 7.2$    |                                                                  |        |                 |
|          |                                                                  | 30                                                               |        | $1.1 \times 10^{-5} \pm 5.4 \times 10^{-5} / 1.6 \times 10^{-5}$        | $10^2$                 | $-15.7 \pm 1.5$    |                                                                  |        |                 |
|          | Parallel                                                         | 0                                                                | 10     | $6.7 \times 10^{-5} \pm 5.8 \times 10^{-6} / 7.3 \times 10^{-5}$        | $10^1$                 | $-11.2 \pm 0.8$    |                                                                  |        |                 |
|          |                                                                  | 10                                                               |        | $1.1 \times 10^{-5} \pm 6.1 \times 10^{-6} / 1.8 \times 10^{-5}$        | $10^1$                 | $-15.2 \pm 1.3$    |                                                                  |        |                 |
|          |                                                                  | 20                                                               |        | $4.6 \times 10^{-6} \pm 2.1 \times 10^{-7} / 4.8 \times 10^{-6}$        | $10^1$                 | $-17.4 \pm 4.4$    |                                                                  |        |                 |
|          |                                                                  | 30                                                               |        | $1.6 \times 10^{-5} \pm 1.1 \times 10^{-5} / 3.5 \times 10^{-5}$        | $10^1$                 | $-15.8 \pm 2.1$    |                                                                  |        |                 |
|          |                                                                  | P2                                                               |        | Perpendicular                                                           | 0                      | 10                 | $5.1 \times 10^{-5} \pm 9.1 \times 10^{-6} / 5.9 \times 10^{-5}$ | $10^1$ | $-11.2 \pm 1.3$ |
|          |                                                                  |                                                                  |        |                                                                         | 10                     |                    | $1.9 \times 10^{-5} \pm 3.3 \times 10^{-6} / 2.4 \times 10^{-5}$ | $10^1$ | $-11.6 \pm 2.2$ |
| 20       | $1.6 \times 10^{-5} \pm 9.1 \times 10^{-6} / 2.8 \times 10^{-5}$ |                                                                  | $10^1$ |                                                                         | $-7.1 \pm 0.6$         |                    |                                                                  |        |                 |
| 30       | $1.6 \times 10^{-5} \pm 2.4 \times 10^{-6} / 1.8 \times 10^{-5}$ |                                                                  | $10^1$ |                                                                         | $-11.8 \pm 0.9$        |                    |                                                                  |        |                 |
| Parallel | 0                                                                |                                                                  | 10     | $5.1 \times 10^{-5} \pm 3.1 \times 10^{-6} / 5.9 \times 10^{-5}$        | $10^1$                 | $-11.2 \pm 1.3$    |                                                                  |        |                 |
|          | 10                                                               |                                                                  |        | $9.1 \times 10^{-6} \pm 1.8 \times 10^{-6} / 1.1 \times 10^{-5}$        | $10^1$                 | $-9.8 \pm 1.4$     |                                                                  |        |                 |
|          | 20                                                               |                                                                  |        | $4.7 \times 10^{-6} \pm 8.3 \times 10^{-6} / 6.2 \times 10^{-6}$        | $10^1$                 | $-7.8 \pm 2.8$     |                                                                  |        |                 |
|          | 30                                                               |                                                                  |        | $1.3 \times 10^{-5} \pm 3.8 \times 10^{-6} / 2.3 \times 10^{-5}$        | $10^1$                 | $-15.2 \pm 0.7$    |                                                                  |        |                 |
|          | P3                                                               |                                                                  |        | Perpendicular                                                           | 0                      | 10                 | $7.7 \times 10^{-5} \pm 1.2 \times 10^{-6} / 9.2 \times 10^{-5}$ | $10^1$ | $-25.3 \pm 0.5$ |
|          |                                                                  |                                                                  |        |                                                                         | 10                     |                    | $3.8 \times 10^{-5} \pm 5.5 \times 10^{-6} / 4.6 \times 10^{-5}$ | $10^1$ | $-18.3 \pm 0.8$ |
| 20       |                                                                  | $6.5 \times 10^{-5} \pm 4.5 \times 10^{-6} / 7.1 \times 10^{-5}$ | $10^1$ |                                                                         | $-28.6 \pm 0.9$        |                    |                                                                  |        |                 |
| 30       |                                                                  | $6.2 \times 10^{-5} \pm 6.9 \times 10^{-6} / 6.8 \times 10^{-5}$ | $10^2$ |                                                                         | $-27.1 \pm 1.2$        |                    |                                                                  |        |                 |
| Parallel |                                                                  | 0                                                                | 10     | $7.7 \times 10^{-5} \pm 1.2 \times 10^{-5} / 9.2 \times 10^{-5}$        | $10^1$                 | $-25.3 \pm 0.5$    |                                                                  |        |                 |
|          |                                                                  | 10                                                               |        | $2.2 \times 10^{-5} \pm 2.5 \times 10^{-6} / 2.3 \times 10^{-5}$        | $10^1$                 | $-24.2 \pm 1.4$    |                                                                  |        |                 |
|          |                                                                  | 20                                                               |        | $2.9 \times 10^{-5} \pm 2.6 \times 10^{-6} / 3.2 \times 10^{-5}$        | $10^1$                 | $-27.2 \pm 4.1$    |                                                                  |        |                 |
|          |                                                                  | 30                                                               |        | $2.6 \times 10^{-5} \pm 5.6 \times 10^{-7} / 2.6 \times 10^{-5}$        | $10^1$                 | $-25.2 \pm 0.8$    |                                                                  |        |                 |
|          |                                                                  | P4                                                               |        | Perpendicular                                                           | 0                      | 10                 | $1.7 \times 10^{-4} \pm 2.8 \times 10^{-5} / 1.9 \times 10^{-4}$ | $10^2$ | $-11.2 \pm 1.6$ |
|          |                                                                  |                                                                  |        |                                                                         | 10                     |                    | $6.8 \times 10^{-5} \pm 2.3 \times 10^{-6} / 9.4 \times 10^{-5}$ | $10^2$ | $-7.9 \pm 1.9$  |
| 20       | $8.3 \times 10^{-5} \pm 1.1 \times 10^{-6} / 9.5 \times 10^{-5}$ |                                                                  | $10^2$ |                                                                         | $-5.6 \pm 2.9$         |                    |                                                                  |        |                 |
| 30       | $6.2 \times 10^{-5} \pm 1.3 \times 10^{-6} / 8.1 \times 10^{-5}$ |                                                                  | $10^2$ |                                                                         | $-5.1 \pm 3.2$         |                    |                                                                  |        |                 |
| Parallel | 0                                                                |                                                                  | 10     | $1.7 \times 10^{-4} \pm 9.8 \times 10^{-6} / 1.2 \times 10^{-5}$        | $10^2$                 | $-11.2 \pm 1.6$    |                                                                  |        |                 |
|          | 10                                                               |                                                                  |        | $1.8 \times 10^{-4} \pm 1.8 \times 10^{-6} / 6.8 \times 10^{-6}$        | $10^2$                 | $-10.2 \pm 3.4$    |                                                                  |        |                 |
|          | 20                                                               |                                                                  |        | $3.3 \times 10^{-5} \pm 1.6 \times 10^{-6} / 9.6 \times 10^{-6}$        | $10^2$                 | $-8.6 \pm 4.1$     |                                                                  |        |                 |
|          | 30                                                               |                                                                  |        | $4.6 \times 10^{-5} \pm 6.9 \times 10^{-6} / 2.1 \times 10^{-5}$        | $10^2$                 | $-7.2 \pm 3.1$     |                                                                  |        |                 |

## Output and transfer curves of OFETs upon strain

### Strain for charge transport oriented perpendicular to strain direction - P1

a)

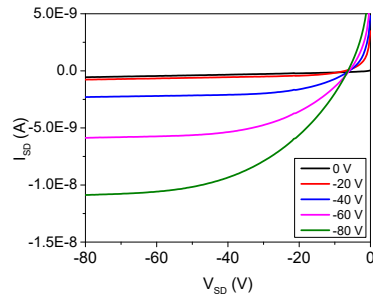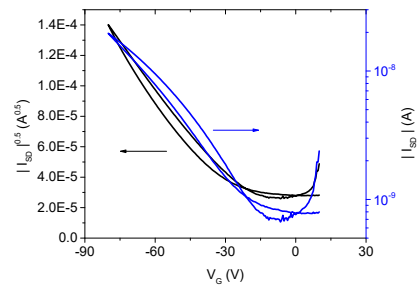

b)

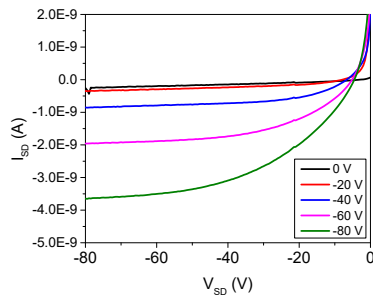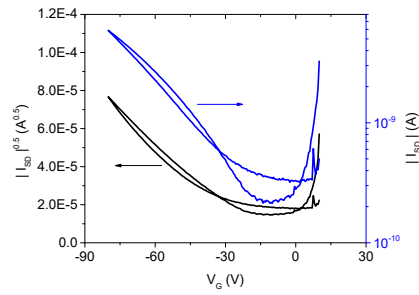

c)

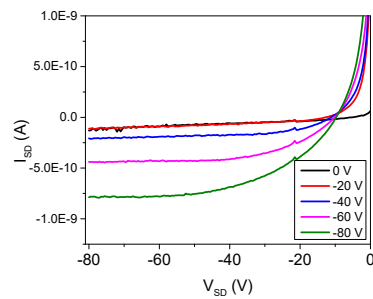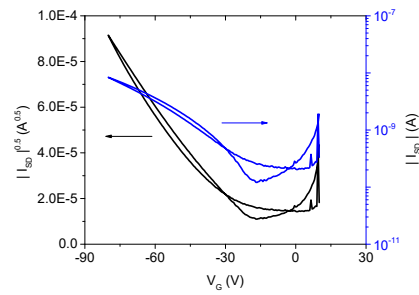

d)

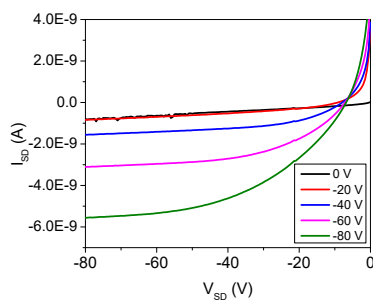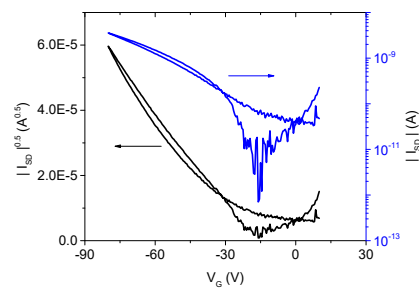

**Figure S9:** Representative OFET characteristics devices prepared from **P1** on SiO<sub>2</sub>. a) output (left) and transfer (right) curves for devices at a) 0%, b) 10%, c) 20% and d) 30% strain for charge transport oriented perpendicular to strain direction.

Strain for charge transport oriented parallel to strain direction - **P1**

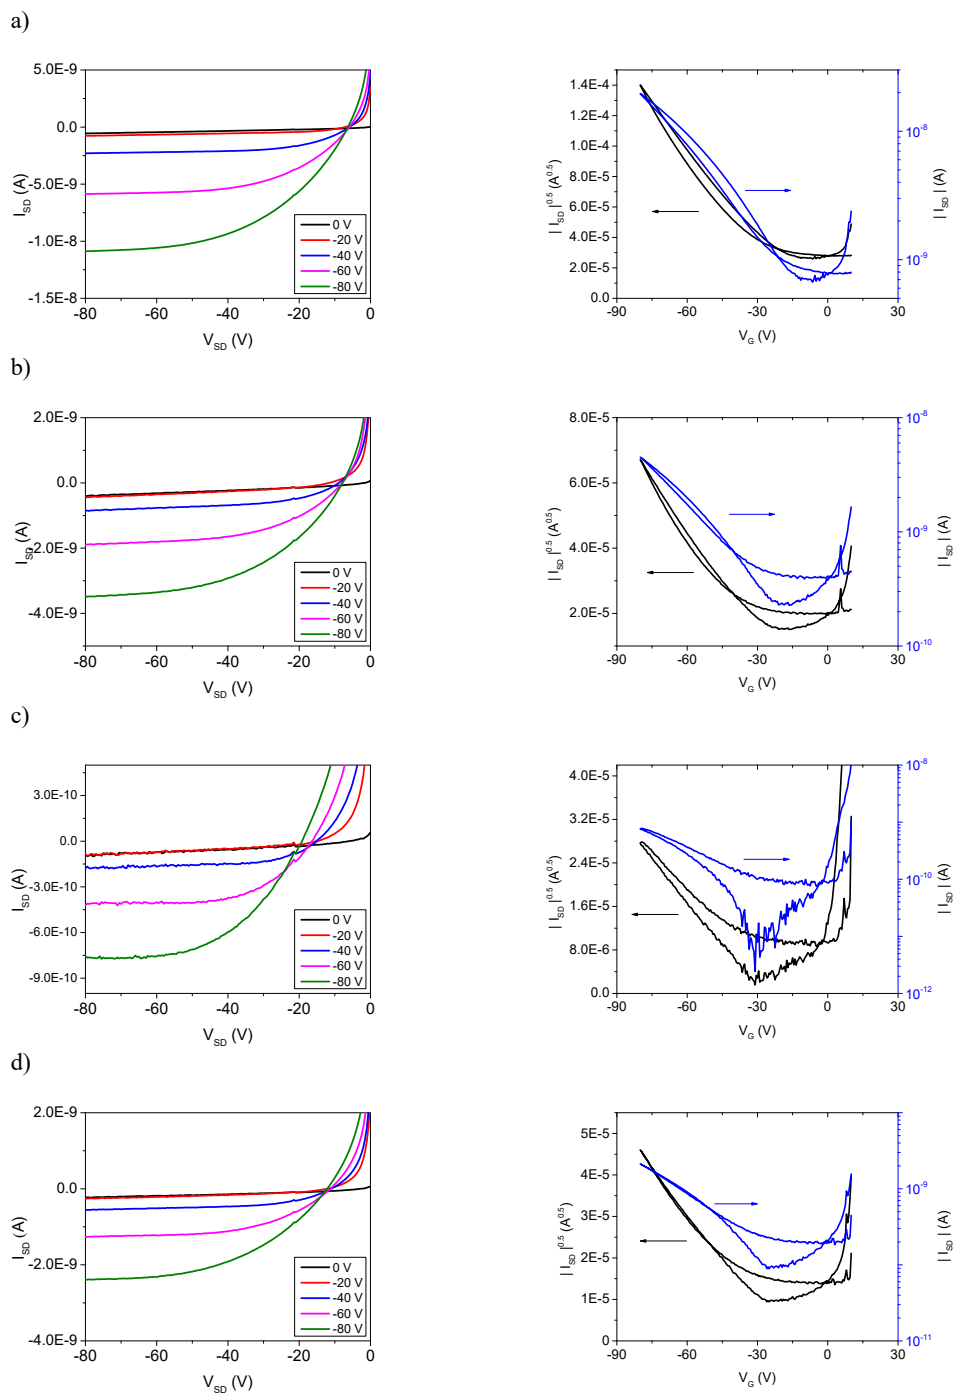

**Figure S10:** Representative OFET characteristics devices prepared from P1 on SiO<sub>2</sub>. a) output (left) and transfer (right) curves for devices at a) 0%, b) 10%, c) 20% and d) 30% strain for charge transport oriented parallel to strain direction.

Strain for charge transport oriented perpendicular to strain direction - P2

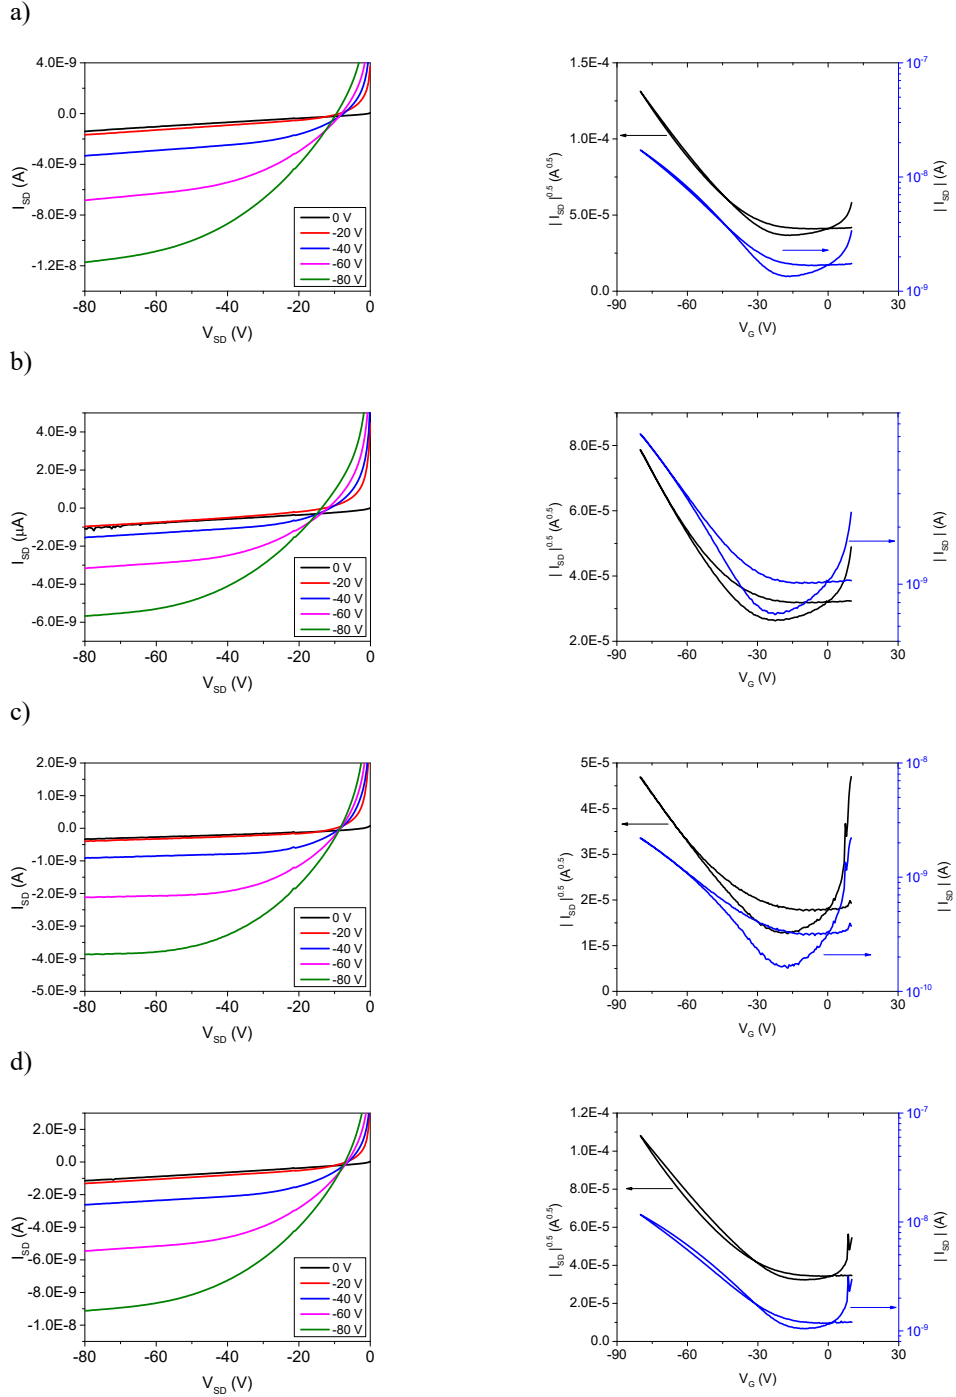

**Figure S11:** Representative OFET characteristics devices prepared from P2 on SiO<sub>2</sub>. a) output (left) and transfer (right) curves for devices at a) 0%, b) 10%, c) 20% and d) 30% strain for charge transport oriented perpendicular to strain direction.

Strain for charge transport oriented parallel to strain direction - P2

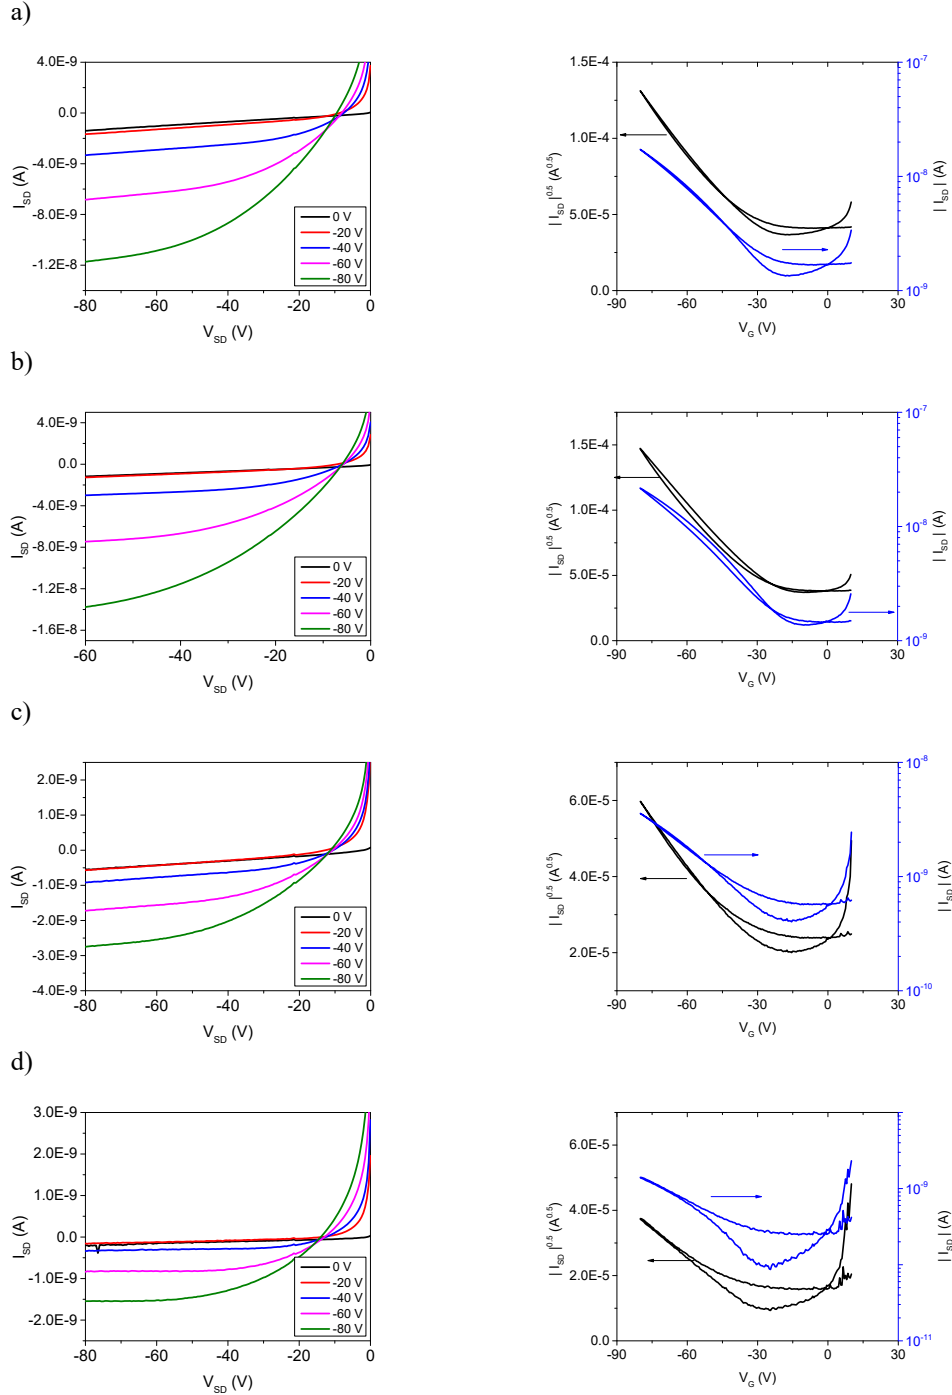

**Figure S12:** Representative OFET characteristics devices prepared from P2 on SiO<sub>2</sub>. a) output (left) and transfer (right) curves for devices at a) 0%, b) 10%, c) 20% and d) 30% strain for charge transport oriented parallel to strain direction.

Strain for charge transport oriented perpendicular to strain direction - P3

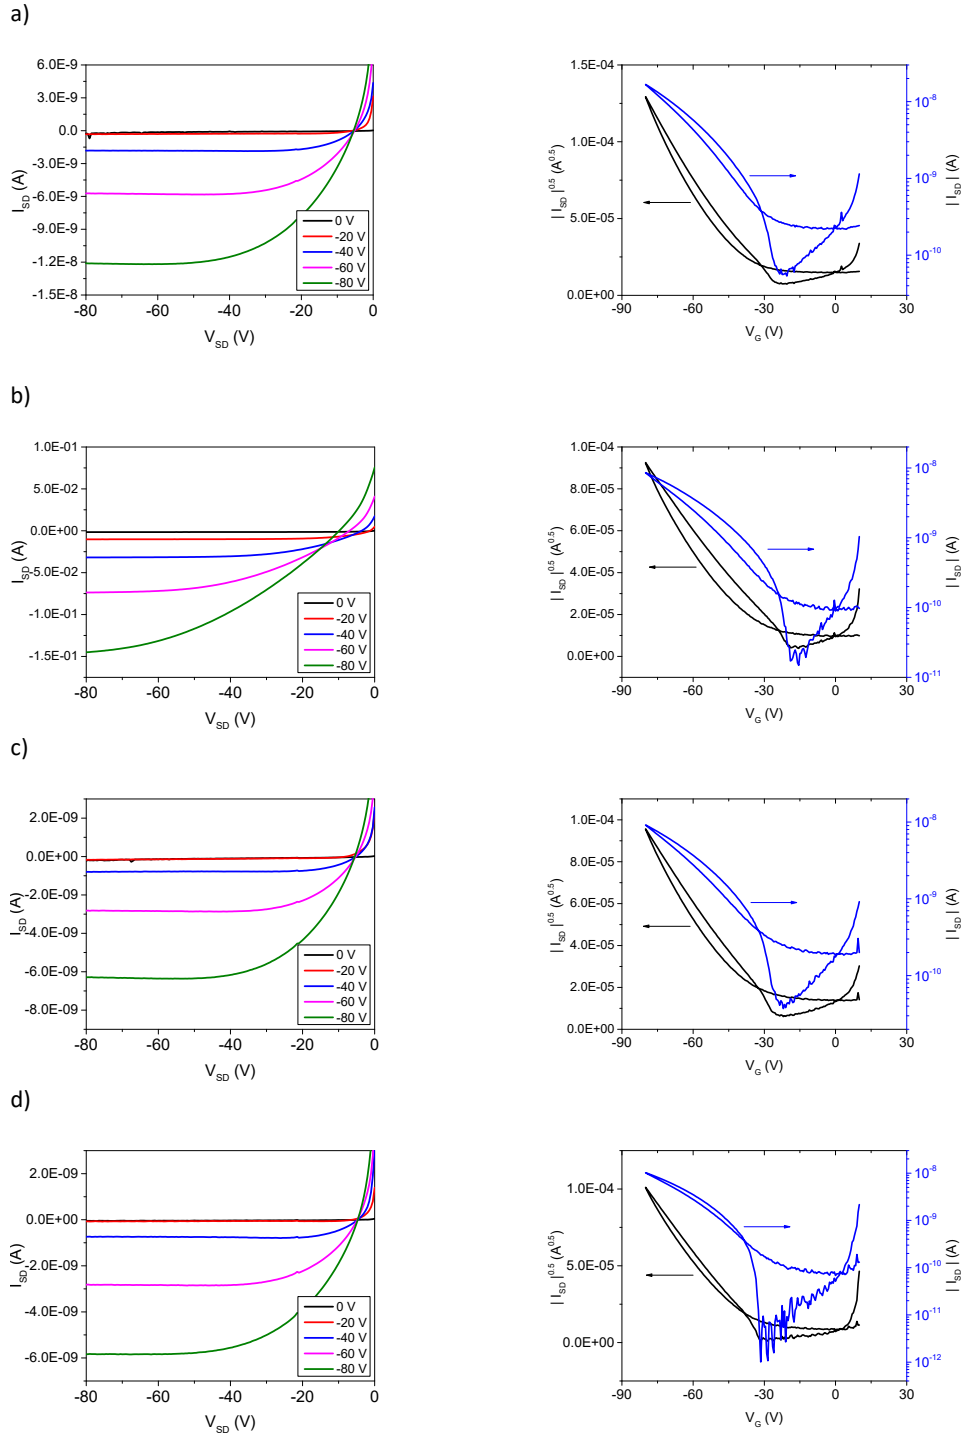



**Figure S13:** Representative OFET characteristics devices prepared from P3 on SiO<sub>2</sub>. a) output (left) and transfer (right) curves for devices at a) 0%, b) 10%, c) 20% and d) 30% strain for charge transport oriented perpendicular to strain direction.

Strain for charge transport oriented parallel to strain direction - P3

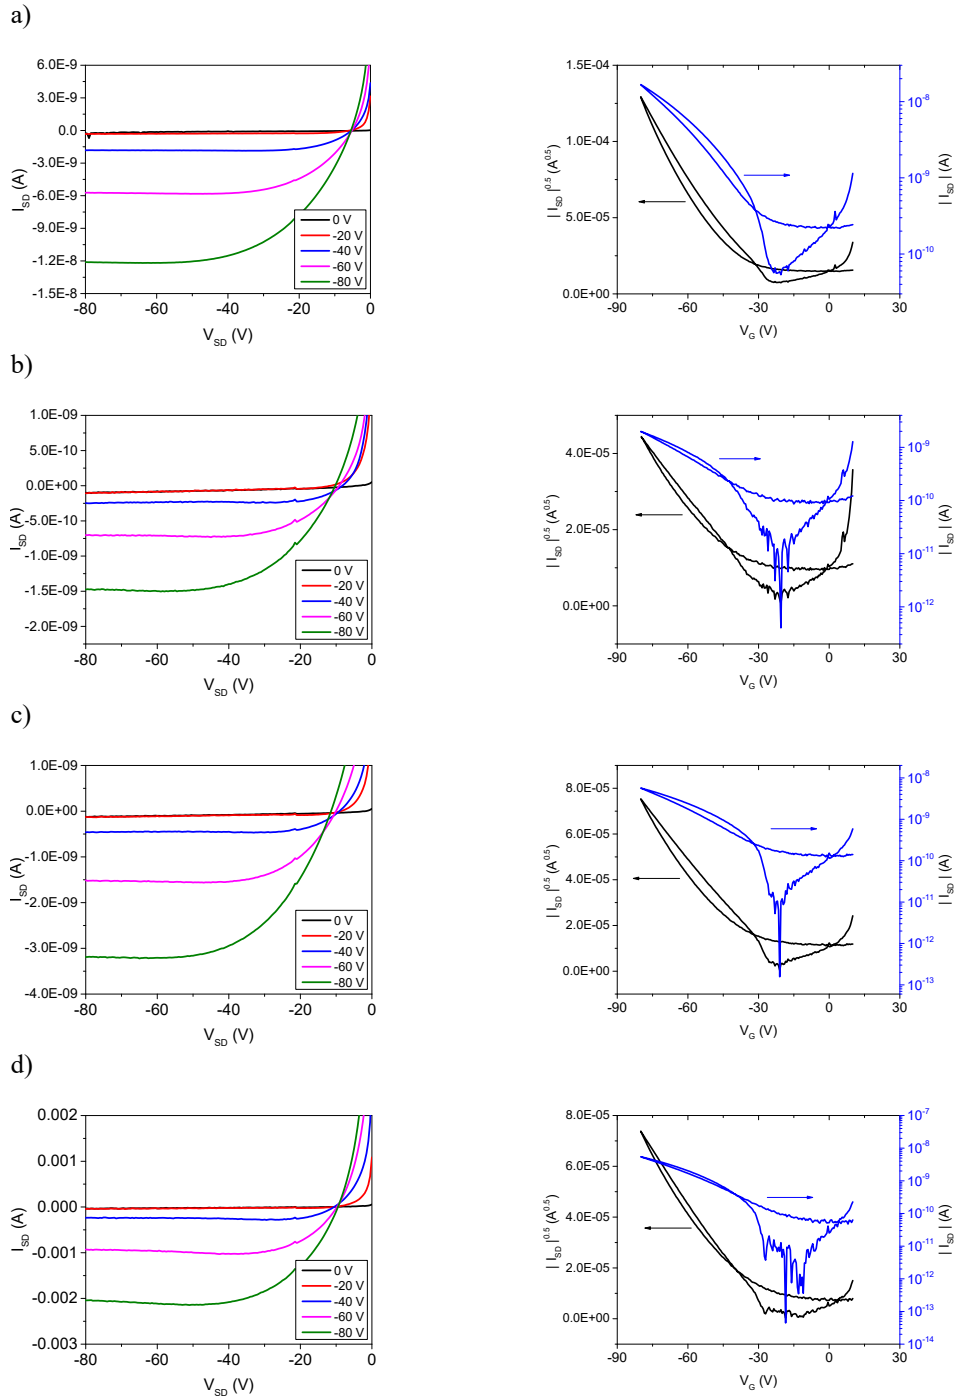

**Figure S14:** Representative OFET characteristics devices prepared from P3 on SiO<sub>2</sub>. a) output (left) and transfer (right) curves for devices at a) 0%, b) 10%, c) 20% and d) 30% strain for charge transport oriented parallel to strain direction.

Strain for charge transport oriented perpendicular to strain direction - P4

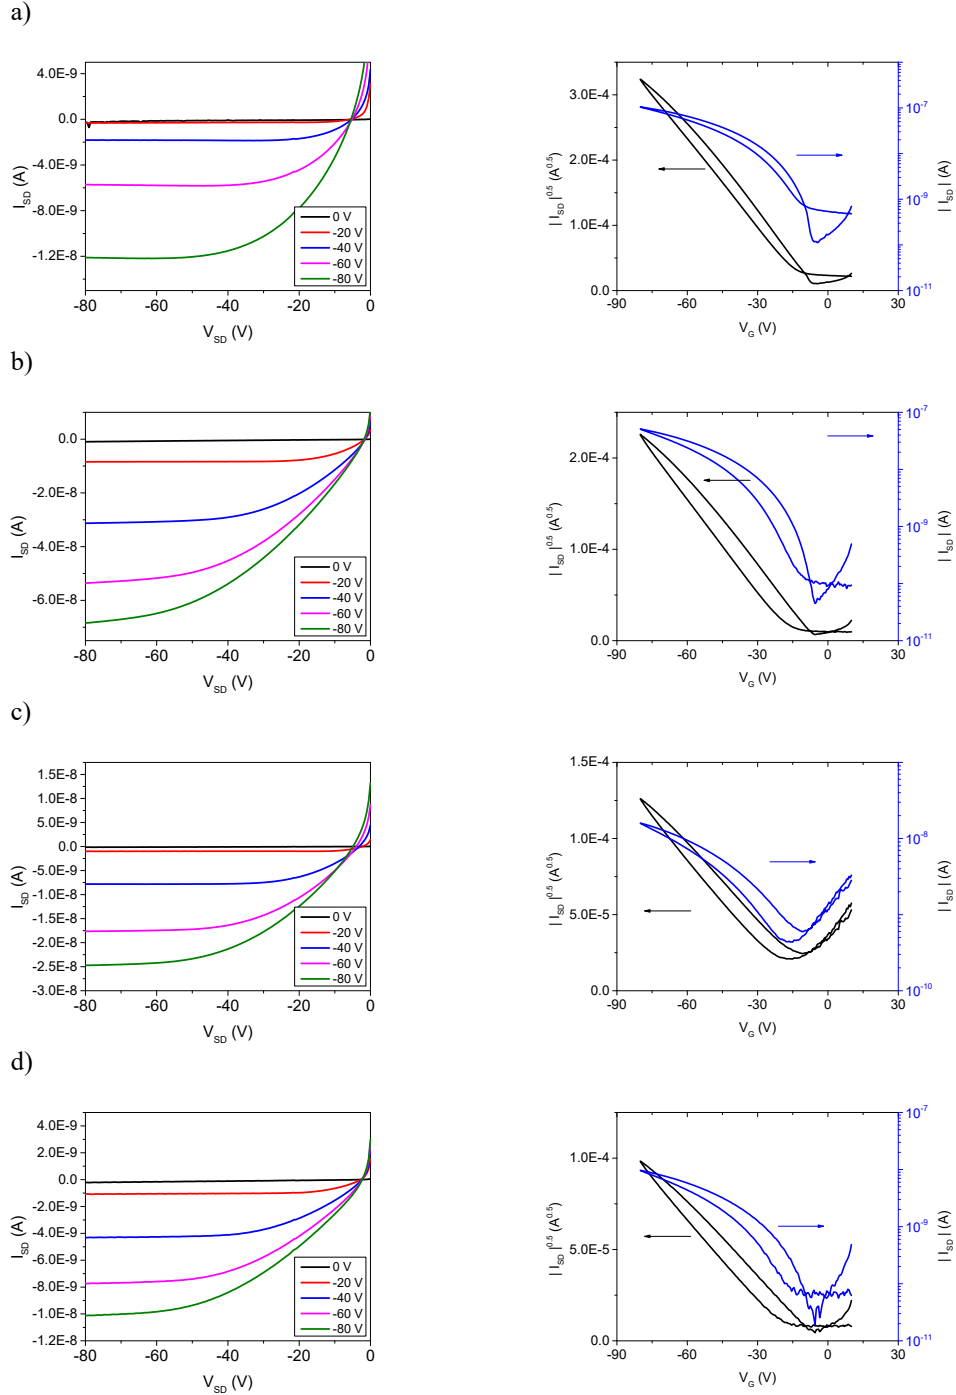

**Figure S15:** Representative OFET characteristics devices prepared from P4 on SiO<sub>2</sub>. a) output (left) and transfer (right) curves for devices at a) 0%, b) 10%, c) 20% and d) 30% strain for charge transport oriented perpendicular to strain direction.

Strain for charge transport oriented parallel to strain direction - P4

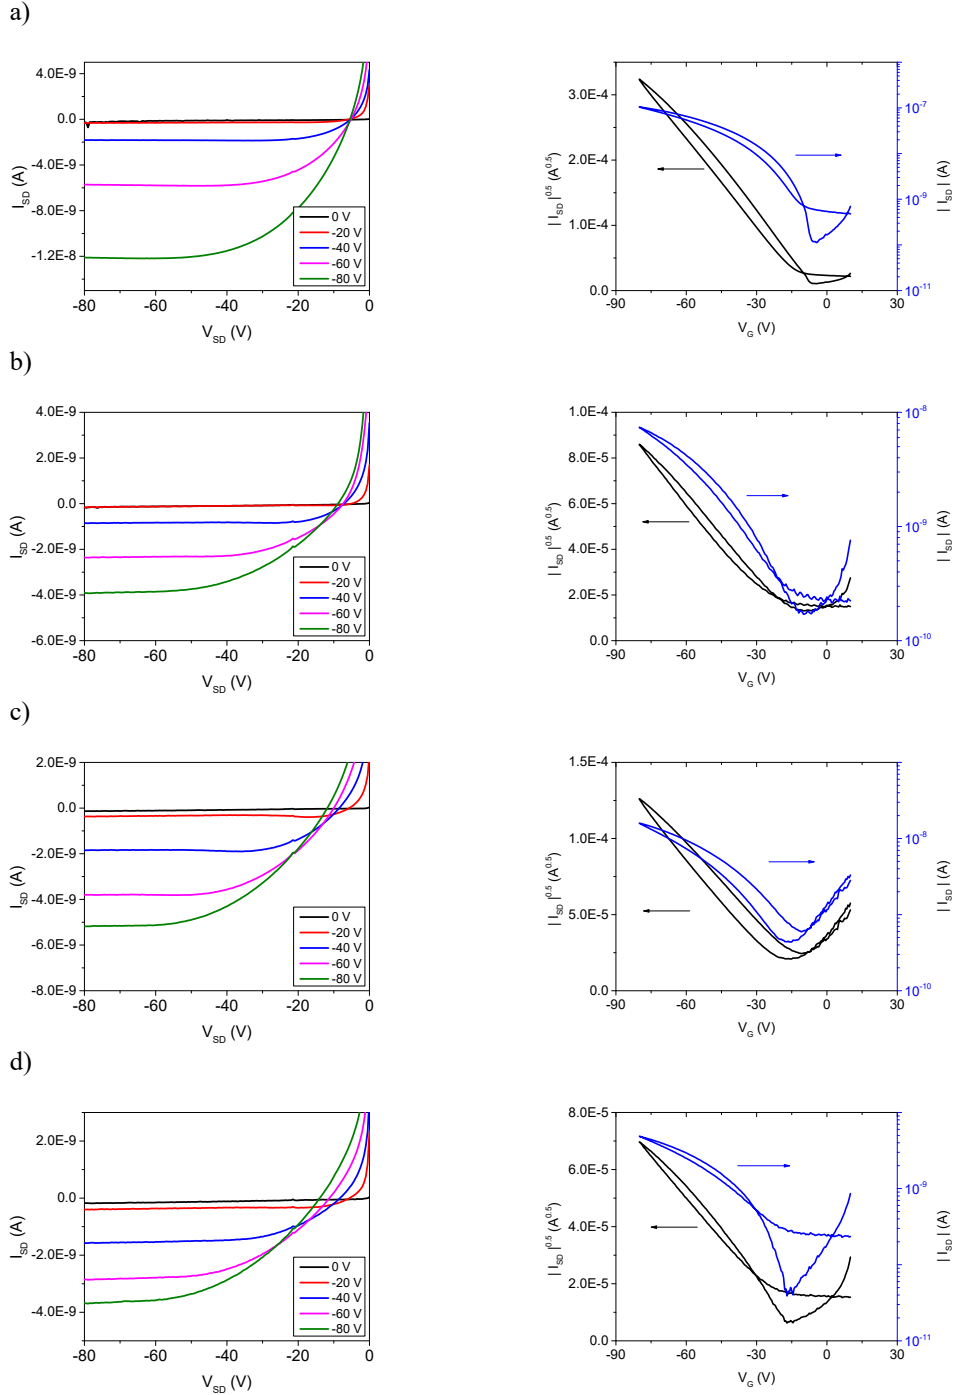

**Figure S16:** Representative OFET characteristics devices prepared from P4 on SiO<sub>2</sub>. a) output (left) and transfer (right) curves for devices at a) 0%, b) 10%, c) 20% and d) 30% strain for charge transport oriented parallel to strain direction.

### Polymers Thickness Measurements with Atomic Force Microscopy (AFM)

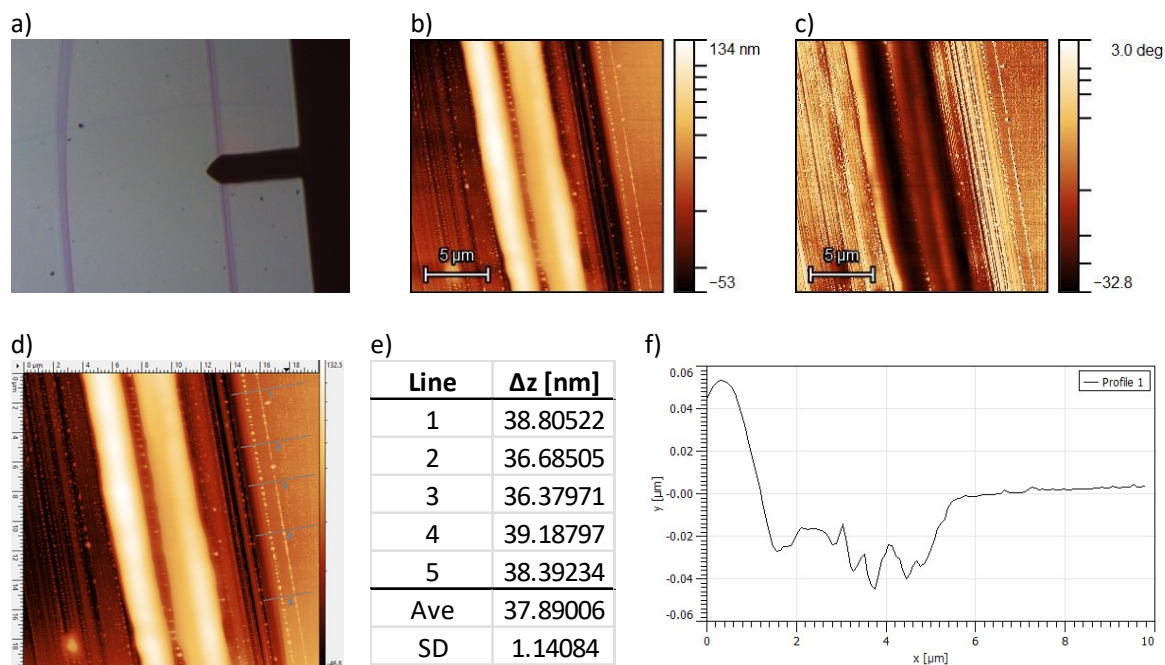

**Figure S17:** AFM thickness measurements for thin films of P1. a) Optical image (10x) from the AFM camera showing the scratch where thickness is being evaluated. The purple line represents the SiO<sub>2</sub> wafer substrate, b) Height image, c) Phase image, d) Height image with five lines across the section to determine thickness, e) Thickness measurements, resulting in an average thickness of  $37.89 \pm 1.14$  nm, f) Height profile image of the scratched area on the thin film.

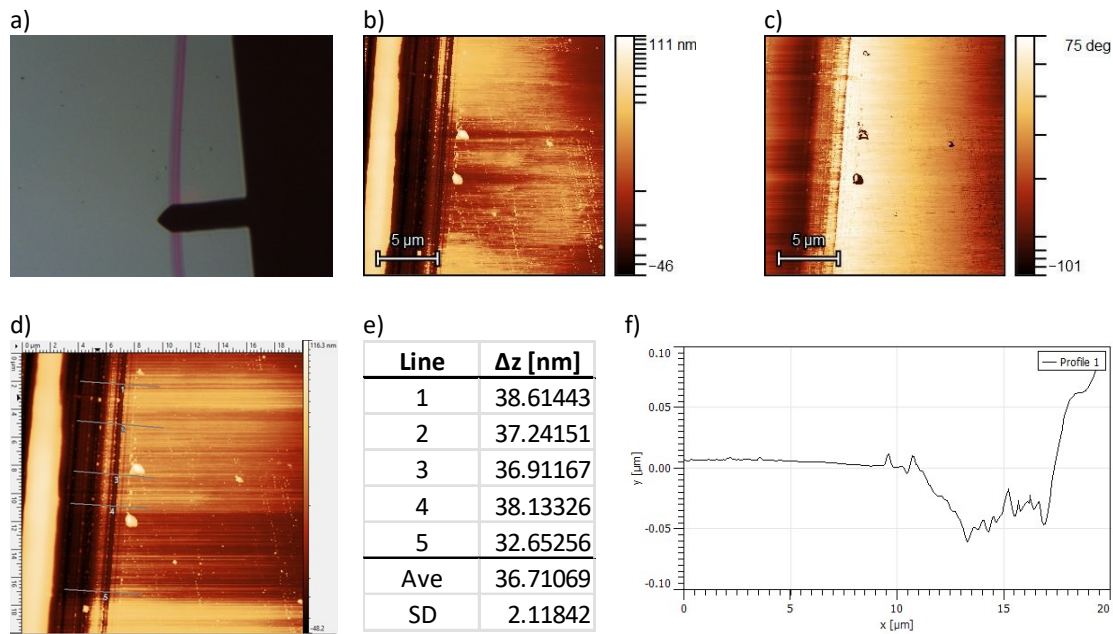

**Figure S18:** AFM thickness measurements for thin films of **P2**. a) Optical image (10x) from the AFM camera showing the scratch where thickness is being evaluated. The purple line represents the SiO<sub>2</sub> wafer substrate, b) Height image, c) Phase image, d) Height image with five lines across the section to determine thickness, e) Thickness measurements, resulting in an average thickness of  $36.71 \pm 2.11$ , f) Height profile image of the scratched area on the thin film.

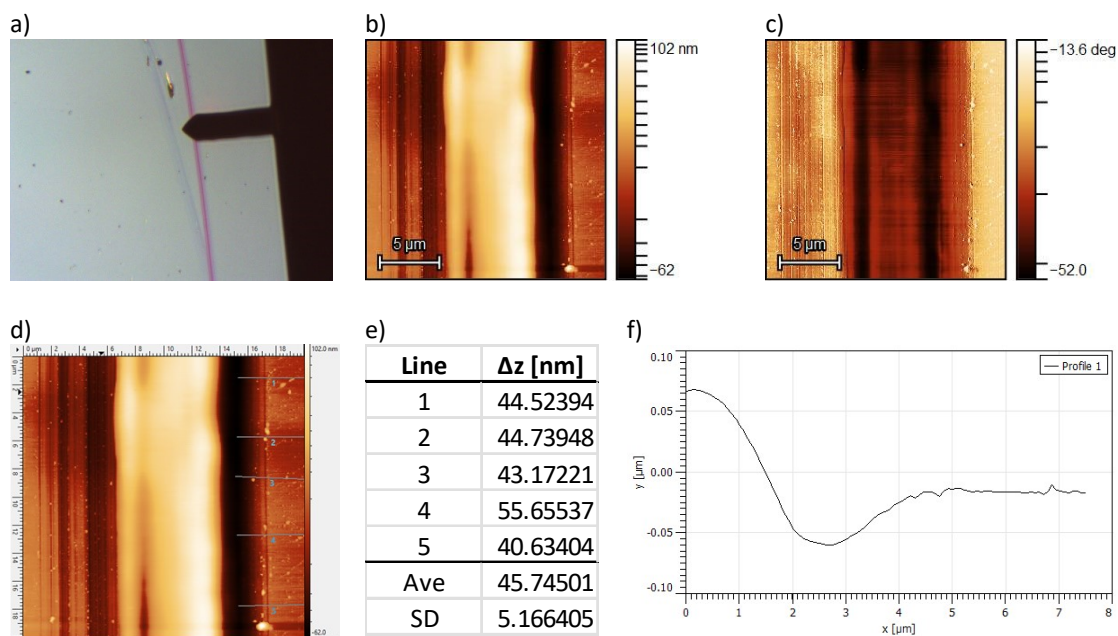

**Figure S19.** AFM thickness measurements for thin films of **P3**. a) Optical image (10x) from the AFM camera showing the scratch where thickness is being evaluated. The purple line represents the SiO<sub>2</sub> wafer substrate, b) Height image, c) Phase image, d) Height image with five lines across the section to determine thickness, e) Thickness measurements, resulting in an average thickness of  $45.74 \pm 5.16$  nm, f) Height profile image of the scratched area on the thin film.

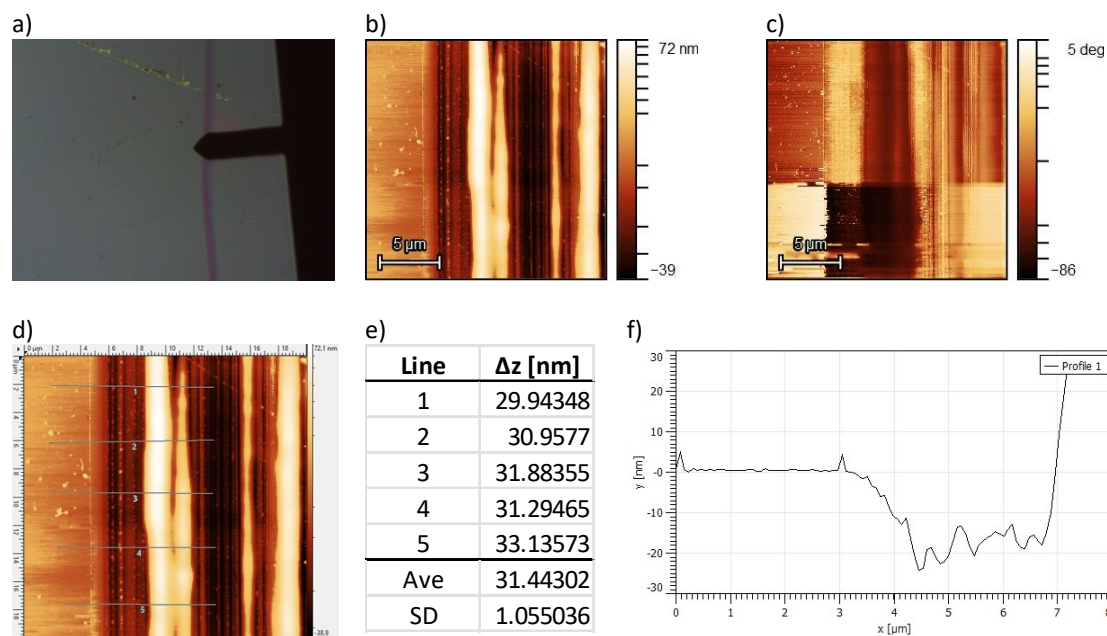

**Figure S20.** AFM thickness measurements for thin films of **P4**. a) Optical image (10x) from the AFM camera showing the scratch where thickness is being evaluated. The purple line represents the SiO<sub>2</sub> wafer substrate, b) Height image, c) Phase image, d) Height image with five lines across the section to determine thickness, e) Thickness measurements, resulting in an average thickness of  $31.44 \pm 1.05$  nm, f) Height profile image of the scratched area on the thin film.

## References

- 1 M. Comí; D. Patra; R. Yang; Z. Chen; A. Harbuzaru; Y. Wubulikasimu; S. Banerjee; R. Ponce Ortiz; Y. Liu; M. Al-Hashimi. Alkoxy Functionalized Benzothiadiazole Based Donor-Acceptor Conjugated Copolymers for Organic Field-Effect Transistors. *J. Mater. Chem. C* 2021, **9**, 5113–5123.
